# Supplementary material for: The Anti-Tumorigenic Activity of Sema3C in the Chick Embryo Chorioallantoic Membrane Model
Source: MDPI journal article supplement (doi:10.3390/ijms20225672), 2019-11-12
Supplement: s1 [file s1]

# Supplementary Materials:

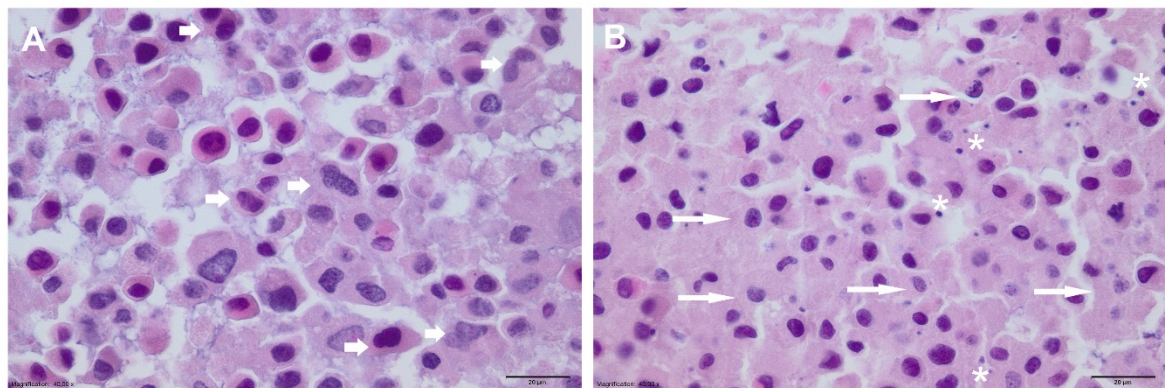

**Supplementary figure S1.** Microscopic images of the tumors on the CAM at x40 magnification. (A) CAM with U87t-Sema3C cell-formed tumor, (B) CAM with U87t-Sema3C tumor treated with 4 mM of NaVP. Non-treated tumor cells in (A) vary more in size, are bigger and more viable (mitotic cells are pointed with short arrows) than NaVP-treated cells in (B). NaVP treated cells in (B) are characterized by shrinkage, nuclear fragmentation (long arrows) and the appearance of apoptotic bodies (asterisks). Scale bar: 20  $\mu$ m.

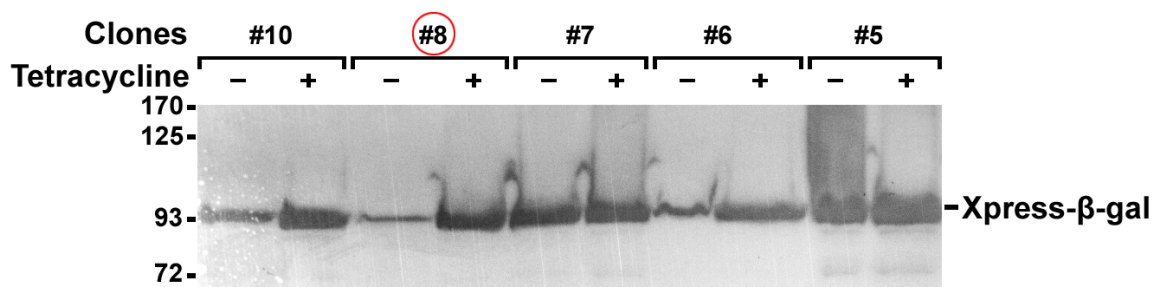

**Supplementary figure S2.** Western blot analysis of individual U87t clones. U87 MG cells were transfected with the TetR-encoding linearized pcDNA6/TR vector. After two-week selection with 6  $\mu$ g/mL of blasticidin, individual U87t clones were selected and transfected with the vector pcDNA4/TO/lacZ encoding Xpress-tagged  $\beta$ -galactosidase driven by the tetracycline-regulated promoter. The transfected cells were treated with or without tetracycline for 48 h. Western blot analysis on whole-cell extracts prepared from transfected cells was carried out by using anti-Xpress antibodies. The tetracycline-dependent expression of Xpress- $\beta$ -gal was most prominent in the clone #8 (marked with the red circle), which was chosen for further experiments under the name U87t. The protein band corresponding to Xpress- $\beta$ -gal indicated on the membrane.
